# Supplementary material for: g:Profiler: a web server for functional enrichment analysis and conversions of gene lists (2019 update)
Source: PubMed Central journal article supplement (PMC6602461; doi:10.1093/nar/gkz369), 2019-05-08
Supplement: gkz369_supplemental_file.pdf [file gkz369_supplemental_file.pdf]

# g:Profiler – a web server for functional enrichment analysis and conversions of gene lists (2019 update)

Uku Raudvere, Liis Kolberg, Ivan Kuzmin, Tambet Arak, Priit Adler, Hedi Peterson, Jaak Vilo

## Supplementary material

|           | Feature                                           | g:Profiler 2016                                                                             | g:Profiler 2019                                                                        |
|-----------|---------------------------------------------------|---------------------------------------------------------------------------------------------|----------------------------------------------------------------------------------------|
| Data      | Number of species/strains                         | 213                                                                                         | 467                                                                                    |
|           | Number of ID types for human                      | 116                                                                                         | 98                                                                                     |
|           | Total number of ID types                          | 369                                                                                         | 429                                                                                    |
|           | Underlying databases                              | Ensembl and Ensembl Genomes Fungi, Metazoa, Plants                                          | Ensembl and Ensembl Genomes Fungi, Metazoa, Plants, <b>WormBase ParaSite</b>           |
|           | Data sources                                      | GO, KEGG, Reactome, TRANSFAC, <b>miRBase</b> , HPA, CORUM, HP, <b>OMIM</b> , <b>BioGRID</b> | GO, KEGG, Reactome, <b>WikiPathways</b> , TRANSFAC, <b>miRTarBase</b> , HPA, CORUM, HP |
| Technical | Database                                          | Berkeley DB                                                                                 | SQLite                                                                                 |
|           | Main codebase                                     | Perl                                                                                        | Python 3                                                                               |
|           | Median response time in seconds                   | 13.0215                                                                                     | 1.508                                                                                  |
|           | Front-end properties                              | mostly static                                                                               | interactive                                                                            |
|           | API response                                      | CSV                                                                                         | JSON                                                                                   |
| Options   | Visualisations                                    | -                                                                                           | Manhattan plot                                                                         |
|           | Multiple query lists                              | g:Cocoa                                                                                     | separate option in g:GOST                                                              |
|           | g:Sorter search tool for gene expression profiles | +                                                                                           | -                                                                                      |
|           | Query input type                                  | list                                                                                        | list, <b>BED file</b>                                                                  |
|           | Custom annotations                                | -                                                                                           | GMT file                                                                               |
|           | Export file formats                               | PNG, CSV, PDF, XLSX, GEM                                                                    | PNG, CSV, GEM                                                                          |
| Packages  | R package                                         | gProfilerR                                                                                  | gprofiler2                                                                             |
|           | Python package                                    | gprofiler-official <b>0.3.5</b>                                                             | gprofiler-official <b>1.0</b>                                                          |

Figure S1: Overview of feature updates and changes in g:Profiler 2019 in comparison to previous update article in 2016.
